# Supplementary material for: Wolbachia pseudogenes and low prevalence infections in tropical but not temperate Australian tephritid fruit flies: manifestations of lateral gene transfer and endosymbiont spillover?
Source: PubMed Central journal article supplement (PMC4575488; doi:10.1186/s12862-015-0474-2), 2015-09-18
Supplement: 12862_2015_474_MOESM2_ESM.pdf [file 12862_2015_474_MOESM2_ESM.pdf]

**Additional File 2.** Laboratory strains screened for *Wolbachia* using *wsp* and 16S rDNA.

| Species                        | Stock line | Laboratory location* | Sampling year | Individual name | 16S | <i>wsp</i> | COI accession no. |
|--------------------------------|------------|----------------------|---------------|-----------------|-----|------------|-------------------|
| <i>Bactrocera neohumeralis</i> | Bneo UWS   | Richmond, UWS        | 2012          | Bn1             | n   | n          |                   |
| <i>Bactrocera neohumeralis</i> | Bneo UWS   | Richmond, UWS        | 2012          | Bn2             | n   | n          |                   |
| <i>Bactrocera neohumeralis</i> | Bneo UWS   | Richmond, UWS        | 2012          | Bn3             | n   | n          |                   |
| <i>Bactrocera neohumeralis</i> | Bneo UWS   | Richmond, UWS        | 2012          | Bn4             | n   | n          |                   |
| <i>Bactrocera neohumeralis</i> | Bneo UWS   | Richmond, UWS        | 2012          | Bn5             | n   | n          |                   |
| <i>Bactrocera neohumeralis</i> | Bneo UWS   | Richmond, UWS        | 2012          | Bn6             | n   | n          |                   |
| <i>Bactrocera neohumeralis</i> | Bneo UWS   | Richmond, UWS        | 2012          | Bn7             | n   | n          |                   |
| <i>Bactrocera neohumeralis</i> | Bneo UWS   | Richmond, UWS        | 2012          | Bn8             | n   | n          |                   |
| <i>Bactrocera cacuminata</i>   | Bcac UWS   | Richmond, UWS        | 2012          | Bcac1           | n   | n          | KC581374          |
| <i>Bactrocera cacuminata</i>   | Bcac UWS   | Richmond, UWS        | 2012          | Bcac2           | n   | n          | KC581374          |
| <i>Bactrocera cacuminata</i>   | Bcac UWS   | Richmond, UWS        | 2012          | Bcac3           | n   | n          |                   |
| <i>Bactrocera cacuminata</i>   | Bcac UWS   | Richmond, UWS        | 2012          | Bcac4           | n   | n          |                   |
| <i>Bactrocera cacuminata</i>   | Bcac UWS   | Richmond, UWS        | 2012          | Bcac5           | n   | n          |                   |
| <i>Bactrocera cacuminata</i>   | Bcac UWS   | Richmond, UWS        | 2012          | Bcac6           | n   | n          |                   |
| <i>Bactrocera cacuminata</i>   | Bcac UWS   | Richmond, UWS        | 2012          | Bcac7           | n   | n          |                   |
| <i>Bactrocera cacuminata</i>   | Bcac UWS   | Richmond, UWS        | 2012          | Bcac8           | n   | n          |                   |
| <i>Bactrocera tryoni</i>       | BtHAC      | Richmond, UWS        | 2012          | HAC1            | n   | n          |                   |
| <i>Bactrocera tryoni</i>       | BtHAC      | Richmond, UWS        | 2012          | HAC2            | n   | n          |                   |
| <i>Bactrocera tryoni</i>       | BtHAC      | Richmond, UWS        | 2012          | HAC3            | n   | n          |                   |
| <i>Bactrocera tryoni</i>       | BtHAC      | Richmond, UWS        | 2012          | HAC4            | n   | n          |                   |
| <i>Bactrocera tryoni</i>       | BtHAC      | Richmond, UWS        | 2012          | HAC5            | n   | n          |                   |
| <i>Bactrocera tryoni</i>       | BtHAC      | Richmond, UWS        | 2012          | HAC6            | n   | n          |                   |
| <i>Bactrocera tryoni</i>       | BtHAC      | Richmond, UWS        | 2012          | HAC7            | n   | n          |                   |
| <i>Bactrocera tryoni</i>       | BtHAC      | Richmond, UWS        | 2012          | HAC8            | n   | n          |                   |
| <i>Bactrocera tryoni</i>       | BtGOS      | Richmond, UWS        | 2012          | GOS1            | n   | n          |                   |
| <i>Bactrocera tryoni</i>       | BtGOS      | Richmond, UWS        | 2012          | GOS2            | n   | n          |                   |
| <i>Bactrocera tryoni</i>       | BtGOS      | Richmond, UWS        | 2012          | GOS3            | n   | n          |                   |
| <i>Bactrocera tryoni</i>       | BtGOS      | Richmond, UWS        | 2012          | GOS4            | n   | n          |                   |
| <i>Bactrocera tryoni</i>       | BtGOS      | Richmond, UWS        | 2012          | GOS5            | n   | n          |                   |
| <i>Bactrocera tryoni</i>       | BtGOS      | Richmond, UWS        | 2012          | GOS6            | n   | n          |                   |
| <i>Bactrocera tryoni</i>       | BtGOS      | Richmond, UWS        | 2012          | GOS7            | n   | n          |                   |
| <i>Bactrocera tryoni</i>       | BtGOS      | Richmond, UWS        | 2012          | GOS8            | n   | n          |                   |
| <i>Bactrocera jarvisi</i>      | Bjar UWS   | Richmond, UWS        | 2012          | Bj1             | n   | n          |                   |
| <i>Bactrocera jarvisi</i>      | Bjar UWS   | Richmond, UWS        | 2012          | Bj2             | n   | n          |                   |
| <i>Bactrocera jarvisi</i>      | Bjar UWS   | Richmond, UWS        | 2012          | Bj3             | n   | n          |                   |
| <i>Bactrocera jarvisi</i>      | Bjar UWS   | Richmond, UWS        | 2012          | Bj4             | n   | n          |                   |
| <i>Bactrocera jarvisi</i>      | Bjar UWS   | Richmond, UWS        | 2012          | Bj5             | n   | n          |                   |
| <i>Bactrocera jarvisi</i>      | Bjar UWS   | Richmond, UWS        | 2012          | Bj6             | n   | n          |                   |
| <i>Bactrocera jarvisi</i>      | Bjar UWS   | Richmond, UWS        | 2012          | Bj7             | n   | n          |                   |
| <i>Bactrocera jarvisi</i>      | Bjar UWS   | Richmond, UWS        | 2012          | Bj8             | n   | n          |                   |

| Species                        | Stock line | Laboratory location* | Sampling year | Individual name | 16S | wsp | COI accession no. |
|--------------------------------|------------|----------------------|---------------|-----------------|-----|-----|-------------------|
| <i>Bactrocera neohumeralis</i> | Bneo09     | Cairns, QDAF         | 2012          | Bn09.1          | n   | n   |                   |
| <i>Bactrocera neohumeralis</i> | Bneo09     | Cairns, QDAF         | 2012          | Bn09.2          | n   | n   |                   |
| <i>Bactrocera neohumeralis</i> | Bneo09     | Cairns, QDAF         | 2012          | Bn09.3          | n   | n   |                   |
| <i>Bactrocera neohumeralis</i> | Bneo09     | Cairns, QDAF         | 2012          | Bn09.4          | n   | n   |                   |
| <i>Bactrocera neohumeralis</i> | Bneo09     | Cairns, QDAF         | 2012          | Bn09.5          | n   | n   |                   |
| <i>Bactrocera neohumeralis</i> | Bneo09     | Cairns, QDAF         | 2012          | Bn09.6          | n   | n   |                   |
| <i>Bactrocera neohumeralis</i> | Bneo09     | Cairns, QDAF         | 2012          | Bn09.7          | n   | n   |                   |
| <i>Bactrocera neohumeralis</i> | Bneo09     | Cairns, QDAF         | 2012          | Bn09.8          | n   | n   |                   |
| <i>Bactrocera neohumeralis</i> | Bneo12     | Cairns, QDAF         | 2012          | Bn12.1          | n   | n   |                   |
| <i>Bactrocera neohumeralis</i> | Bneo12     | Cairns, QDAF         | 2012          | Bn12.2          | n   | n   |                   |
| <i>Bactrocera neohumeralis</i> | Bneo12     | Cairns, QDAF         | 2012          | Bn12.3          | n   | n   |                   |
| <i>Bactrocera neohumeralis</i> | Bneo12     | Cairns, QDAF         | 2012          | Bn12.4          | n   | n   |                   |
| <i>Bactrocera neohumeralis</i> | Bneo12     | Cairns, QDAF         | 2012          | Bn12.5          | n   | n   |                   |
| <i>Bactrocera neohumeralis</i> | Bneo12     | Cairns, QDAF         | 2012          | Bn12.6          | n   | n   |                   |
| <i>Bactrocera neohumeralis</i> | Bneo12     | Cairns, QDAF         | 2012          | Bn12.7          | n   | n   |                   |
| <i>Bactrocera neohumeralis</i> | Bneo12     | Cairns, QDAF         | 2012          | Bn12.8          | n   | n   |                   |
| <i>Ceratitis capitata</i>      | MedFly     | Perth, DAFWA         | 2011          | MF1             | n   | n   | KC581412          |
| <i>Ceratitis capitata</i>      | MedFly     | Perth, DAFWA         | 2011          | MF2             | n   | n   |                   |
| <i>Ceratitis capitata</i>      | MedFly     | Perth, DAFWA         | 2011          | MF3             | n   | n   |                   |
| <i>Ceratitis capitata</i>      | MedFly     | Perth, DAFWA         | 2011          | MF4             | n   | n   |                   |
| <i>Ceratitis capitata</i>      | MedFly     | Perth, DAFWA         | 2011          | MF5             | n   | n   |                   |
| <i>Ceratitis capitata</i>      | MedFly     | Perth, DAFWA         | 2011          | MF6             | n   | n   |                   |
| <i>Ceratitis capitata</i>      | MedFly     | Perth, DAFWA         | 2011          | MF7             | n   | n   |                   |
| <i>Ceratitis capitata</i>      | MedFly     | Perth, DAFWA         | 2011          | MF8             | n   | n   |                   |

\*UWS (University of Western Sydney), QDAF (Queensland Department of Agriculture and Fisheries), DAFWA (Department of Agriculture and Food, Western Australia)
