# Supplementary material for: Wolbachia pseudogenes and low prevalence infections in tropical but not temperate Australian tephritid fruit flies: manifestations of lateral gene transfer and endosymbiont spillover?
Source: PubMed Central journal article supplement (PMC4575488; doi:10.1186/s12862-015-0474-2), 2015-09-18
Supplement: 12862_2015_474_MOESM3_ESM.pdf [file 12862_2015_474_MOESM3_ESM.pdf]

**Additional File 3.** PCR conditions and primer sequences used in this research

|                        | <i>wsp</i>                                                                                                                                                                          | <i>16S</i>                                                                                    | <i>COI</i> and Sequencing                                                                     | DIG-labelled <i>wsp</i> probe                                                                                                                                                       |
|------------------------|-------------------------------------------------------------------------------------------------------------------------------------------------------------------------------------|-----------------------------------------------------------------------------------------------|-----------------------------------------------------------------------------------------------|-------------------------------------------------------------------------------------------------------------------------------------------------------------------------------------|
| <b>PCR protocol</b>    |                                                                                                                                                                                     |                                                                                               |                                                                                               |                                                                                                                                                                                     |
| Total volume           | 10µL / 20µL                                                                                                                                                                         | 10µL                                                                                          | 20µL                                                                                          | 50µL                                                                                                                                                                                |
| GoTaq Reaction Buffer  | 1X                                                                                                                                                                                  | 1X                                                                                            | 1X                                                                                            | 1X                                                                                                                                                                                  |
| MgCl <sub>2</sub>      | 4mM                                                                                                                                                                                 | 2mM                                                                                           | 2.5mM                                                                                         | 5mM                                                                                                                                                                                 |
| dNTP                   | 150µM each                                                                                                                                                                          | 125µM each                                                                                    | 200µM each                                                                                    | 2.5µL (DIG-dNTP labelling mixture)                                                                                                                                                  |
| Primer 1               | 0.8µM                                                                                                                                                                               | 0.63µM                                                                                        | 0.4µM                                                                                         | 0.6µM                                                                                                                                                                               |
| Primer 2               | 0.8µM                                                                                                                                                                               | 0.63µM                                                                                        | 0.4µM                                                                                         | 0.6µM                                                                                                                                                                               |
| GoTaq DNA polymerase   | 0.4u / 0.8u                                                                                                                                                                         | 0.5u                                                                                          | 0.5u                                                                                          | 1u                                                                                                                                                                                  |
| DNA Template           | 1µL / 2µL                                                                                                                                                                           | 1µL                                                                                           | 2µL                                                                                           | 2µL                                                                                                                                                                                 |
| <b>Thermal Cycling</b> |                                                                                                                                                                                     |                                                                                               |                                                                                               |                                                                                                                                                                                     |
| Denaturation           | 94°C for 2min<br>94°C for 10s, 65°C for 30s, 68°C for 1min (x10 cycles)<br>94°C for 10s, 65°C for 30s, 68°C for 1min (x25 cycles, including an incremental increase of 20s at 68°C) | 94°C for 5min<br>94°C for 30s, 54°C for 30s, 72°C for 1min (x35 cycles)<br><br>72°C for 10min | 94°C for 5min<br>94°C for 30s, 55°C for 30s, 72°C for 1min (x35 cycles)<br><br>72°C for 10min | 94°C for 2min<br>94°C for 10s, 65°C for 30s, 68°C for 1min (x10 cycles)<br>94°C for 10s, 65°C for 30s, 68°C for 1min (x25 cycles, including an incremental increase of 20s at 68°C) |
| <b>Primers</b>         |                                                                                                                                                                                     |                                                                                               |                                                                                               |                                                                                                                                                                                     |
| <i>wsp</i>             |                                                                                                                                                                                     |                                                                                               |                                                                                               |                                                                                                                                                                                     |
| Wsp-F                  | TGGTCCAATAAGTGATGAAGAACTAGCTA                                                                                                                                                       | Jeyaprakash and Hoy, 2000                                                                     |                                                                                               |                                                                                                                                                                                     |
| Wsp-R                  | AAAAATTAACGCTACTCCAGCTTCTGCAC                                                                                                                                                       | Jeyaprakash and Hoy, 2000                                                                     |                                                                                               |                                                                                                                                                                                     |
| <i>16S</i>             |                                                                                                                                                                                     |                                                                                               |                                                                                               |                                                                                                                                                                                     |
| wspecF                 | CATACCTATTCGAAGGGATAG                                                                                                                                                               | Werren and Windsor, 2000                                                                      |                                                                                               |                                                                                                                                                                                     |
| wspecR                 | AGCTTCGAGTGAAACCAATTC                                                                                                                                                               | Werren and Windsor, 2000                                                                      |                                                                                               |                                                                                                                                                                                     |
| <i>COI</i>             |                                                                                                                                                                                     |                                                                                               |                                                                                               |                                                                                                                                                                                     |
| Dick (C1-J-2441)       | CCTACAGGAATTAATAATTTTAGATGATTA                                                                                                                                                      | Simon et al. 1994                                                                             |                                                                                               |                                                                                                                                                                                     |
| Pat (TL2-N-3014)       | TCCATTGCACTAATCTGCCATATTA                                                                                                                                                           | Simon et al. 1994                                                                             |                                                                                               |                                                                                                                                                                                     |
| Sequencing             |                                                                                                                                                                                     |                                                                                               |                                                                                               |                                                                                                                                                                                     |
| T7 Promoter            | TAATACGACTCACTATAGGG                                                                                                                                                                |                                                                                               |                                                                                               |                                                                                                                                                                                     |
| SP6                    | ATTTAGGTGACACTATAG                                                                                                                                                                  |                                                                                               |                                                                                               |                                                                                                                                                                                     |
