# Supplementary material for: Wolbachia pseudogenes and low prevalence infections in tropical but not temperate Australian tephritid fruit flies: manifestations of lateral gene transfer and endosymbiont spillover?
Source: PubMed Central journal article supplement (PMC4575488; doi:10.1186/s12862-015-0474-2), 2015-09-18
Supplement: 12862_2015_474_MOESM4_ESM.pdf [file 12862_2015_474_MOESM4_ESM.pdf]

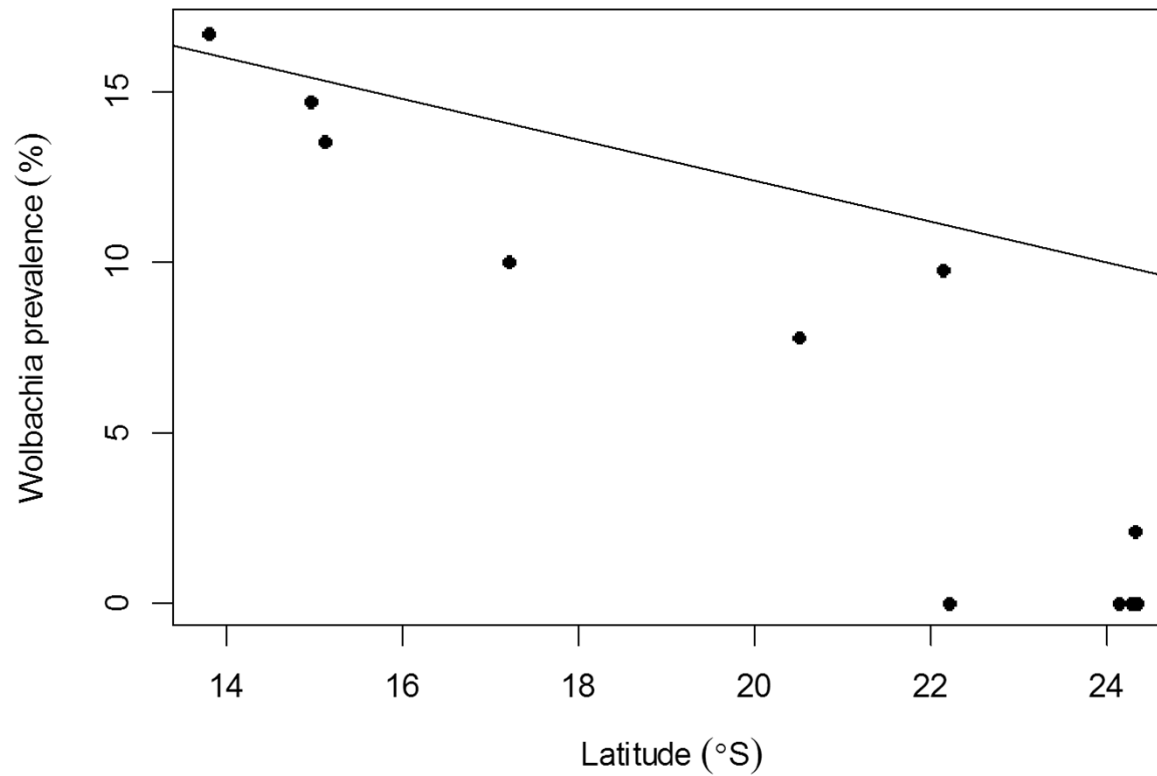

**Additional File 4.** Relationship between prevalence of *Wolbachia* infection in twelve tephritid species and the midpoint of their latitudinal distribution, based on Hancock *et al.* [32] and Royer and Hancock [33] ( $R^2 = 0.86$ ,  $F_{1,10} = 71.43$ ;  $p < 0.001$ ). At least ten individuals were tested for uninfected species (*B. cacuminata*, *B. chorista*, *B. jarvisi*, *D. aequalis*, *D. pornia*).
