# Supplementary material for: Wolbachia pseudogenes and low prevalence infections in tropical but not temperate Australian tephritid fruit flies: manifestations of lateral gene transfer and endosymbiont spillover?
Source: PubMed Central journal article supplement (PMC4575488; doi:10.1186/s12862-015-0474-2), 2015-09-18
Supplement: 12862_2015_474_MOESM5_ESM.pdf [file 12862_2015_474_MOESM5_ESM.pdf]

**Additional File 5.** Comparison of *Wolbachia* infected individuals sampled from equatorial and tropical regions for (A) *B. bryoniae* (B), *B. frauenfeldi* (C) *B. neohumeralis*, (D) *B. strigifinis* and (E) *B. tryoni* over five collection years. Fisher's exact test shows overall no significant (ns) temporal effect at  $\alpha = 0.05$ , except for *B. tryoni*, but this did not represent an overall increase or decrease in prevalence.

| Collection year | A<br><i>B. bryoniae</i> | B<br><i>B. frauenfeldi</i> | C<br><i>B. neohumeralis</i> | D<br><i>B. strigifinis</i> | E<br><i>B. tryoni</i> |
|-----------------|-------------------------|----------------------------|-----------------------------|----------------------------|-----------------------|
| 1997            | 0/7                     |                            |                             |                            |                       |
| 1998            | 1/8                     | 0/3                        | 2/14                        | 3/12                       | 0/23                  |
| 2001            | 1/2                     | 2/6                        | 1/4                         | 0/3                        | 2/5                   |
| 2012            |                         | 0/5                        | 10/64                       | 0/4                        |                       |
| 2013            | 2/28                    | 3/20                       |                             | 2/18                       | 2/65                  |
| p value         | p = 0.222               | p=0.612                    | p = 0.848                   | p = 0.610                  | p = 0.019*            |
