# Supplementary material for: Wolbachia pseudogenes and low prevalence infections in tropical but not temperate Australian tephritid fruit flies: manifestations of lateral gene transfer and endosymbiont spillover?
Source: PubMed Central journal article supplement (PMC4575488; doi:10.1186/s12862-015-0474-2), 2015-09-18
Supplement: 12862_2015_474_MOESM6_ESM.pdf [file 12862_2015_474_MOESM6_ESM.pdf]

**Additional File 6.** Distance matrix of *COI* sequences covering 551bp positions of *Bactrocera tryoni* and *Bactrocera neohumeralis* individuals, grouped by *Wolbachia* -infected (grey shading) and uninfected (no shading). Below the diagonal are the pairwise number of differences and above the diagonal are p-distance values. P-distances given for within- and between- group means below the main table.

| Species and individual ID.<br>No. | <i>B. neohumeralis</i> _106 | <i>B. neohumeralis</i> _142 | <i>B. neohumeralis</i> _143 | <i>B. neohumeralis</i> _23 | <i>B. neohumeralis</i> _24 | <i>B. neohumeralis</i> _242 | <i>B. neohumeralis</i> _26 | <i>B. neohumeralis</i> _27 | <i>B. tryoni</i> _121 | <i>B. tryoni</i> _152 | <i>B. tryoni</i> _167 | <i>B. tryoni</i> _182 | <i>B. neohumeralis</i> _109 | <i>B. neohumeralis</i> _160 | <i>B. neohumeralis</i> _221 | <i>B. neohumeralis</i> _238 | <i>B. neohumeralis</i> _240 | <i>B. neohumeralis</i> _243 | <i>B. neohumeralis</i> _244 | <i>B. neohumeralis</i> _248 | <i>B. neohumeralis</i> _35 | <i>B. tryoni</i> _275 | <i>B. tryoni</i> _276 |
|-----------------------------------|-----------------------------|-----------------------------|-----------------------------|----------------------------|----------------------------|-----------------------------|----------------------------|----------------------------|-----------------------|-----------------------|-----------------------|-----------------------|-----------------------------|-----------------------------|-----------------------------|-----------------------------|-----------------------------|-----------------------------|-----------------------------|-----------------------------|----------------------------|-----------------------|-----------------------|
| <i>B. neohumeralis</i> _106       |                             | 0.016                       | 0.016                       | 0.018                      | 0.027                      | 0.016                       | 0.022                      | 0.016                      | 0.011                 | 0.020                 | 0.015                 | 0.016                 | 0.016                       | 0.025                       | 0.020                       | 0.018                       | 0.018                       | 0.022                       | 0.025                       | 0.016                       | 0.025                      | 0.009                 | 0.016                 |
| <i>B. neohumeralis</i> _142       | 9                           |                             | 0.004                       | 0.005                      | 0.018                      | 0.004                       | 0.013                      | 0.004                      | 0.009                 | 0.011                 | 0.016                 | 0.018                 | 0.004                       | 0.016                       | 0.011                       | 0.009                       | 0.005                       | 0.016                       | 0.016                       | 0.007                       | 0.016                      | 0.011                 | 0.007                 |
| <i>B. neohumeralis</i> _143       | 9                           | 2                           |                             | 0.005                      | 0.018                      | 0.004                       | 0.013                      | 0.004                      | 0.009                 | 0.011                 | 0.016                 | 0.018                 | 0.004                       | 0.016                       | 0.011                       | 0.009                       | 0.005                       | 0.016                       | 0.016                       | 0.007                       | 0.016                      | 0.011                 | 0.007                 |
| <i>B. neohumeralis</i> _23        | 10                          | 3                           | 3                           |                            | 0.016                      | 0.005                       | 0.011                      | 0.005                      | 0.011                 | 0.013                 | 0.018                 | 0.020                 | 0.005                       | 0.015                       | 0.009                       | 0.007                       | 0.004                       | 0.016                       | 0.015                       | 0.009                       | 0.015                      | 0.013                 | 0.009                 |
| <i>B. neohumeralis</i> _24        | 15                          | 10                          | 10                          | 9                          |                            | 0.018                       | 0.005                      | 0.015                      | 0.020                 | 0.018                 | 0.024                 | 0.025                 | 0.018                       | 0.005                       | 0.007                       | 0.009                       | 0.016                       | 0.011                       | 0.009                       | 0.018                       | 0.002                      | 0.022                 | 0.022                 |
| <i>B. neohumeralis</i> _242       | 9                           | 2                           | 2                           | 3                          | 10                         |                             | 0.013                      | 0.004                      | 0.009                 | 0.011                 | 0.016                 | 0.018                 | 0.004                       | 0.016                       | 0.011                       | 0.009                       | 0.005                       | 0.016                       | 0.016                       | 0.007                       | 0.016                      | 0.007                 | 0.007                 |
| <i>B. neohumeralis</i> _26        | 12                          | 7                           | 7                           | 6                          | 3                          | 7                           |                            | 0.009                      | 0.015                 | 0.013                 | 0.018                 | 0.020                 | 0.013                       | 0.004                       | 0.002                       | 0.004                       | 0.011                       | 0.005                       | 0.004                       | 0.013                       | 0.007                      | 0.016                 | 0.016                 |
| <i>B. neohumeralis</i> _27        | 9                           | 2                           | 2                           | 3                          | 8                          | 2                           | 5                          |                            | 0.009                 | 0.007                 | 0.013                 | 0.015                 | 0.004                       | 0.013                       | 0.007                       | 0.005                       | 0.005                       | 0.013                       | 0.013                       | 0.007                       | 0.013                      | 0.011                 | 0.007                 |
| <i>B. tryoni</i> _121             | 6                           | 5                           | 5                           | 6                          | 11                         | 5                           | 8                          | 5                          |                       | 0.013                 | 0.018                 | 0.020                 | 0.009                       | 0.018                       | 0.013                       | 0.011                       | 0.011                       | 0.018                       | 0.018                       | 0.009                       | 0.018                      | 0.013                 | 0.013                 |
| <i>B. tryoni</i> _152             | 11                          | 6                           | 6                           | 7                          | 10                         | 6                           | 7                          | 4                          | 7                     |                       | 0.016                 | 0.018                 | 0.011                       | 0.016                       | 0.011                       | 0.009                       | 0.013                       | 0.016                       | 0.016                       | 0.004                       | 0.016                      | 0.015                 | 0.015                 |
| <i>B. tryoni</i> _167             | 8                           | 9                           | 9                           | 10                         | 13                         | 9                           | 10                         | 7                          | 10                    | 9                     |                       | 0.002                 | 0.016                       | 0.022                       | 0.016                       | 0.015                       | 0.018                       | 0.022                       | 0.022                       | 0.016                       | 0.022                      | 0.009                 | 0.020                 |
| <i>B. tryoni</i> _182             | 9                           | 10                          | 10                          | 11                         | 14                         | 10                          | 11                         | 8                          | 11                    | 10                    | 1                     |                       | 0.018                       | 0.024                       | 0.018                       | 0.016                       | 0.020                       | 0.024                       | 0.024                       | 0.018                       | 0.024                      | 0.011                 | 0.022                 |
| <i>B. neohumeralis</i> _109       | 9                           | 2                           | 2                           | 3                          | 10                         | 2                           | 7                          | 2                          | 5                     | 6                     | 9                     | 10                    |                             | 0.013                       | 0.011                       | 0.009                       | 0.005                       | 0.016                       | 0.016                       | 0.007                       | 0.016                      | 0.011                 | 0.007                 |
| <i>B. neohumeralis</i> _160       | 14                          | 9                           | 9                           | 8                          | 3                          | 9                           | 2                          | 7                          | 10                    | 9                     | 12                    | 13                    | 7                           |                             | 0.005                       | 0.007                       | 0.015                       | 0.009                       | 0.007                       | 0.016                       | 0.007                      | 0.020                 | 0.020                 |
| <i>B. neohumeralis</i> _221       | 11                          | 6                           | 6                           | 5                          | 4                          | 6                           | 1                          | 4                          | 7                     | 6                     | 9                     | 10                    | 6                           | 3                           |                             | 0.002                       | 0.009                       | 0.007                       | 0.005                       | 0.011                       | 0.009                      | 0.015                 | 0.015                 |
| <i>B. neohumeralis</i> _238       | 10                          | 5                           | 5                           | 4                          | 5                          | 5                           | 2                          | 3                          | 6                     | 5                     | 8                     | 9                     | 5                           | 4                           | 1                           |                             | 0.007                       | 0.009                       | 0.007                       | 0.009                       | 0.011                      | 0.013                 | 0.013                 |
| <i>B. neohumeralis</i> _240       | 10                          | 3                           | 3                           | 2                          | 9                          | 3                           | 6                          | 3                          | 6                     | 7                     | 10                    | 11                    | 3                           | 8                           | 5                           | 4                           |                             | 0.016                       | 0.015                       | 0.009                       | 0.015                      | 0.013                 | 0.005                 |
| <i>B. neohumeralis</i> _243       | 12                          | 9                           | 9                           | 9                          | 6                          | 9                           | 3                          | 7                          | 10                    | 9                     | 12                    | 13                    | 9                           | 5                           | 4                           | 5                           | 9                           |                             | 0.009                       | 0.016                       | 0.013                      | 0.020                 | 0.020                 |
| <i>B. neohumeralis</i> _244       | 14                          | 9                           | 9                           | 8                          | 5                          | 9                           | 2                          | 7                          | 10                    | 9                     | 12                    | 13                    | 9                           | 4                           | 3                           | 4                           | 8                           | 5                           |                             | 0.016                       | 0.011                      | 0.020                 | 0.020                 |
| <i>B. neohumeralis</i> _248       | 9                           | 4                           | 4                           | 5                          | 10                         | 4                           | 7                          | 4                          | 5                     | 2                     | 9                     | 10                    | 4                           | 9                           | 6                           | 5                           | 5                           | 9                           | 9                           |                             | 0.016                      | 0.011                 | 0.011                 |
| <i>B. neohumeralis</i> _35        | 14                          | 9                           | 9                           | 8                          | 1                          | 9                           | 4                          | 7                          | 10                    | 9                     | 12                    | 13                    | 9                           | 4                           | 5                           | 6                           | 8                           | 7                           | 6                           | 9                           |                            | 0.020                 | 0.020                 |
| <i>B. tryoni</i> _275             | 5                           | 6                           | 6                           | 7                          | 12                         | 4                           | 9                          | 6                          | 7                     | 8                     | 5                     | 6                     | 6                           | 11                          | 8                           | 7                           | 7                           | 11                          | 11                          | 6                           | 11                         |                       | 0.015                 |
| <i>B. tryoni</i> _276             | 9                           | 4                           | 4                           | 5                          | 12                         | 4                           | 9                          | 4                          | 7                     | 8                     | 11                    | 12                    | 4                           | 11                          | 8                           | 7                           | 3                           | 11                          | 11                          | 6                           | 11                         | 8                     |                       |
| Group means                       | within group                |                             | between groups              |                            |                            |                             |                            |                            |                       |                       |                       |                       |                             |                             |                             |                             |                             |                             |                             |                             |                            |                       |                       |
| <i>Wolbachia</i> negative         | 0.0136                      |                             | 0.0131                      |                            |                            |                             |                            |                            |                       |                       |                       |                       |                             |                             |                             |                             |                             |                             |                             |                             |                            |                       |                       |
| <i>Wolbachia</i> positive         | 0.0122                      |                             |                             |                            |                            |                             |                            |                            |                       |                       |                       |                       |                             |                             |                             |                             |                             |                             |                             |                             |                            |                       |                       |
